# Supplementary material for: Aging Suppresses Skin-Derived Circulating SDF1 to Promote Full-Thickness Tissue Regeneration
Source: PubMed Central journal article supplement (PMC6261459; doi:10.1016/j.celrep.2018.08.054), 2018-09-25
Supplement: NIHMS1508940-supplement-1.pdf [file NIHMS1508940-supplement-1.pdf]

**Cell Reports, Volume 24**

**Supplemental Information**

**Aging Suppresses Skin-Derived Circulating SDF1  
to Promote Full-Thickness Tissue Regeneration**

**Mailyn A. Nishiguchi, Casey A. Spencer, Denis H. Leung, and Thomas H. Leung**

**Aging suppresses skin-derived circulating SDF1  
to promote full-thickness tissue regeneration**

**Authors:** Mailyn A. Nishiguchi<sup>1,4</sup>, Casey A. Spencer<sup>1,4</sup>, Denis H. Leung<sup>3</sup>, Thomas H. Leung<sup>1,2,5\*</sup>

**Comprehensive Supplemental Information**

Figure S1-S4

**B Ki-67 Immunostaining**

Week 4

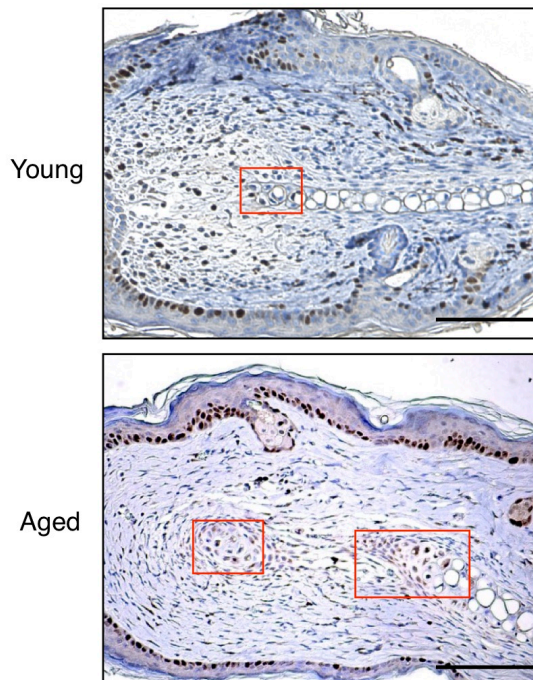

**A**

18-mo. old WT mice

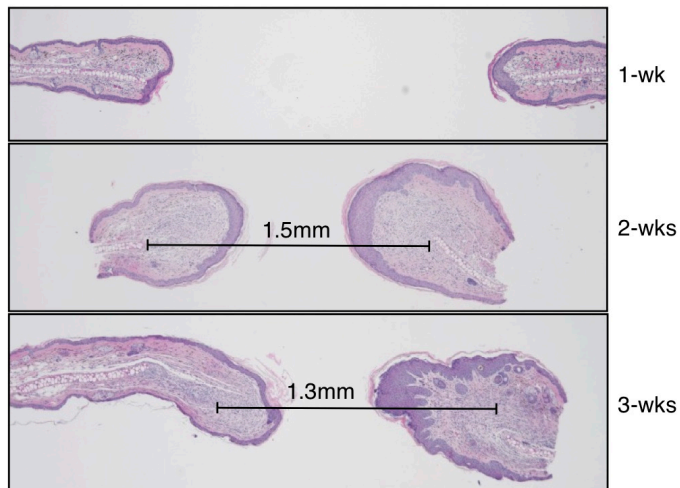

**C Stented Mouse Back Wounds**

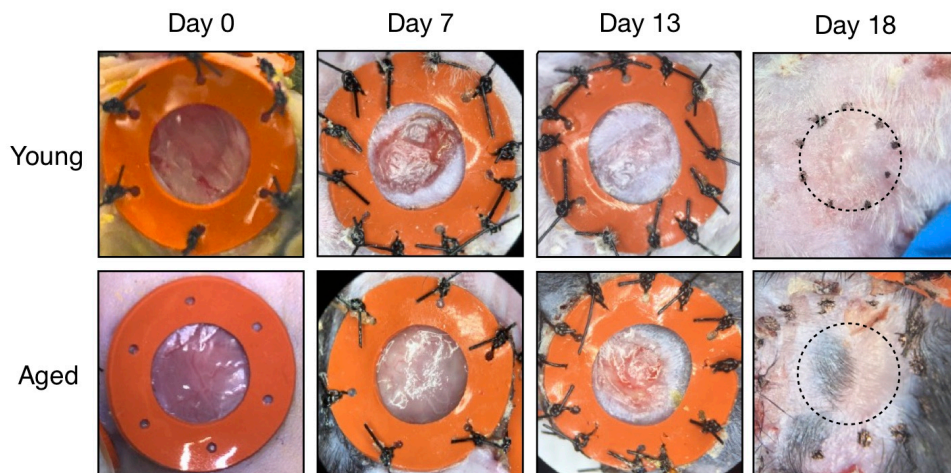

**D New hair follicle formation during wound repair in aged mice**

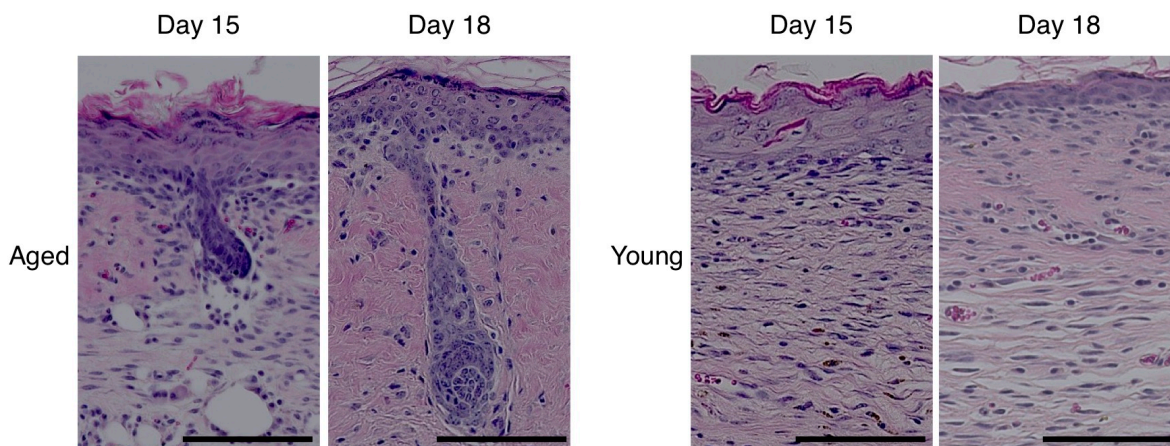

## Supplemental Information

### Figure S1, Related to Figure 1: Aging promotes tissue regeneration and diminishes scar formation in mice skin.

(A) H&E staining of wound edge tissue taken from aged WT mice at weeks 1-3.  $N=20$ . Solid vertical lines indicate the ends of the cartilage plate.

(B) Ear tissue from injured aged mice demonstrate increased chondrocyte proliferation. Ki-67 immunostaining (brown cells). Red squares identify areas of Ki-67 positive chondrocytes.  $N=4$ .

(C) Stented mouse back wounds: representative photographs of young and aged WT mice at different time points.  $N=5$ .

(D) New hair follicle formation during dorsal back skin repair in aged mice. Representative H&E staining of wound edge tissue taken from young and aged WT mice at Day 15 and Day 18 after injury.  $N=3$ . Scale bars,  $100\mu\text{M}$ .

**Fig. S2**

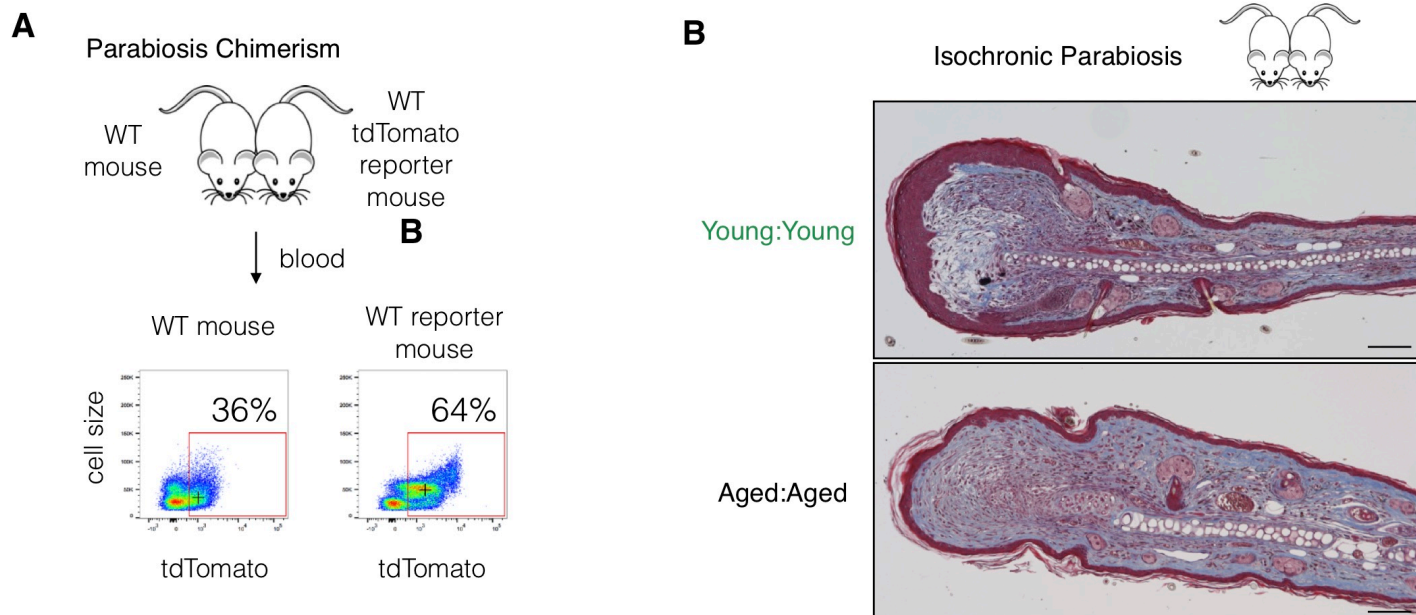

**C** Extending Time Between Parabiosis and Injury

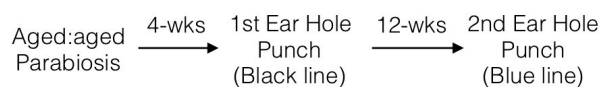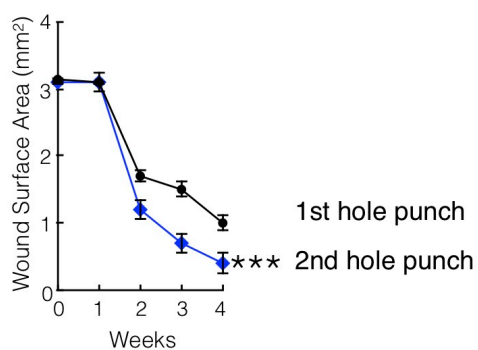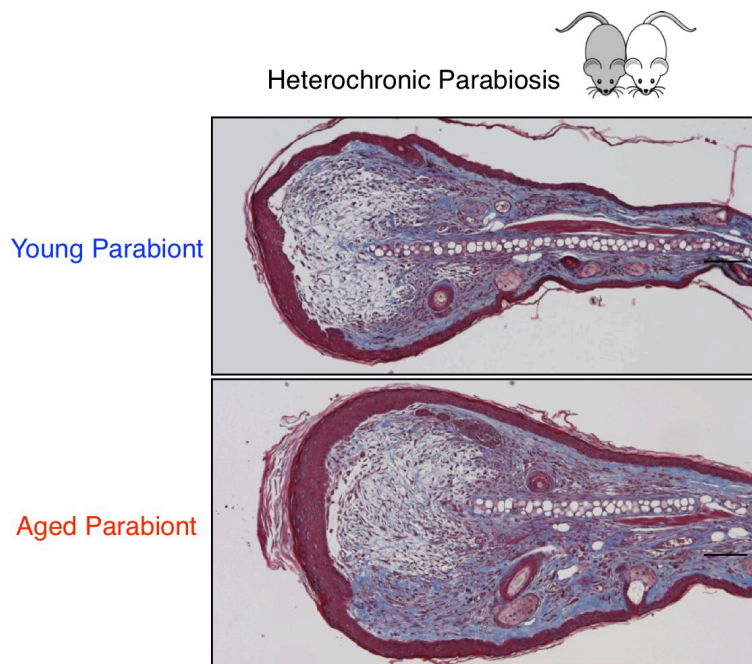

**D** FACS Gating Scheme for Isolating Keratinocytes and Dermal-based cells

**WT K14-CreER<sup>mTmG</sup>**

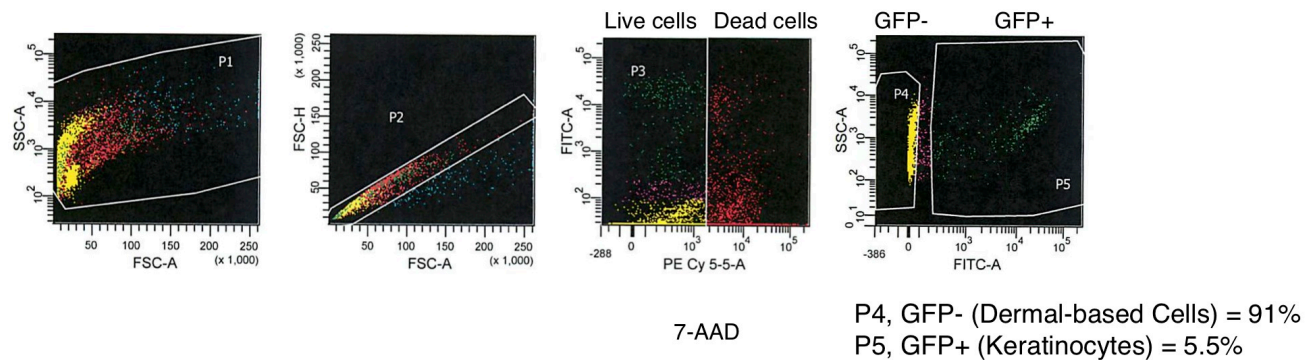

**Figure S2, Related to Figure 2: Aged parabionts from heterochronic parabiosis pairs adopt the young parabiont phenotype.**

(A) Parabiosis chimerism: Representative FACS plot of blood taken from a parabiosis pair consisting of a fluorescent reporter mouse (R26R<sup>mTmG</sup>, Jackson Labs) and age-matched control mouse (C57/BL6, Jackson Labs).  $N=5$ . WT mouse blood percentage of Td-Tomato<sup>+</sup> cells ranged between 36-45%, which is similar to previously published studies (Conboy et al., 2005).

Experiment repeated 3 times independently.

(B) Trichrome staining of ear wound-edge tissue from parabiosis pairs. Low magnification images to demonstrate consistent background Trichrome staining.  $N=5$ .

(C) Extending the time period between parabiosis procedure and ear injury improves ear hole closure in aged:aged isochronic pairs. After 12-weeks, a second distinct ear hole punch was performed and followed.  $N=3$ . (\*\*\*)  $P=1.5e-13$ .

(D) Representative FACS gating scheme for keratinocyte and dermal-based cell isolation from WT K14-CreER<sup>mTmG</sup> mice.

$N$ =biological replicates per group. Error bars are s.e.m.

**Fig. S3**

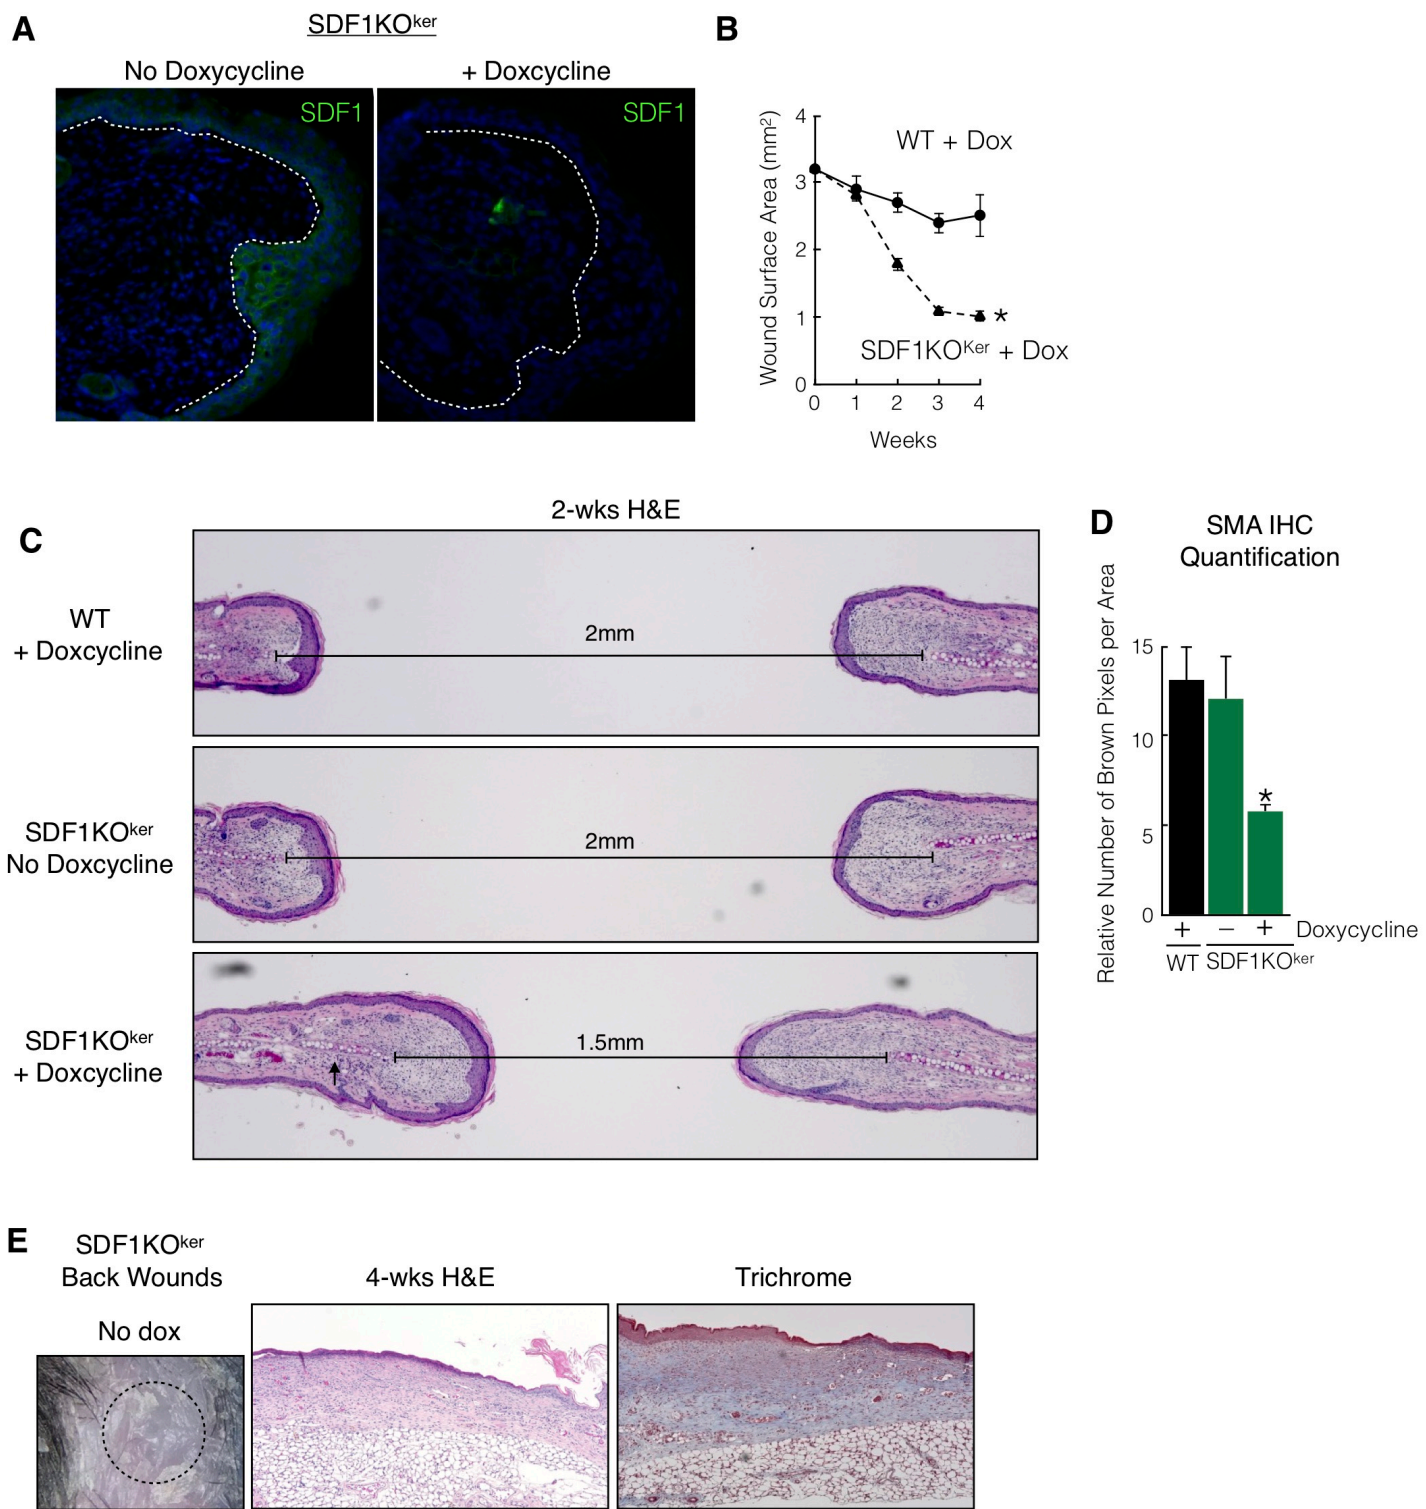

**Figure S3, Related to Figure 3: Young skin-specific SDF1 knockout mice (SDF1KO<sup>ker</sup>) exhibit improved ear hole closure.**

(A) Doxycycline treatment specifically deletes SDF1 expression in the skin of SDF1KO<sup>ker</sup> mice. SDF1 immunostaining (green) of wound edge tissue taken from control (no doxycycline treatment) or doxycycline-treated SDF1KO<sup>ker</sup> mice at 1-week post-injury. Dotted line identifies epidermal-dermal border. *N*=6.

(B) Doxycycline treatment does not induce ear hole closure in young WT mice. Ear hole measurements from doxycycline-treated SDF1KO<sup>ker</sup> and doxycycline-treated WT littermate control mice on weeks 0-4. *N*=5. (\*) *P*=0.01.

(C) Doxycycline-treated SDF1KO<sup>ker</sup> mice exhibit improved chondrocyte proliferation and absence of scar formation. H&E staining of wound edge tissue taken from control (WT mice treated with doxycycline and SDF1KO<sup>ker</sup> mice without doxycycline treatment) and doxycycline-treated SDF1KO<sup>ker</sup> mice at 2-weeks post-injury. Solid vertical lines indicate the ends of the cartilage plate. Black arrow indicates cartilage regeneration. *N*=6.

(D) Doxycycline-treated SDF1KO<sup>ker</sup> mice exhibit less  $\alpha$ SMA expression 2-weeks after ear injury. Quantification of  $\alpha$ SMA immunostaining (Fig. 3E). *N*=6. (\*) *P*=0.04

(E) Non-doxycycline-treated SDF1KO<sup>ker</sup> back wounds (control) heal with a fibrotic scar: photographs, H&E staining, and Trichrome staining at 4-weeks post-injury. *N*=5.

*N*=biological replicates per group. Error bars are s.e.m. Scale bars, 100 $\mu$ M.



**Fig. S4**

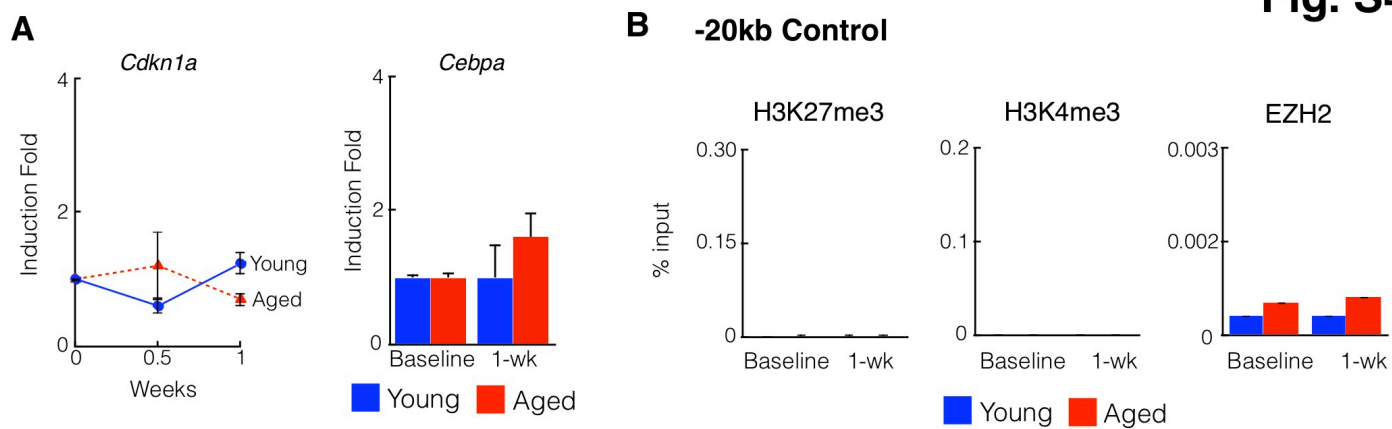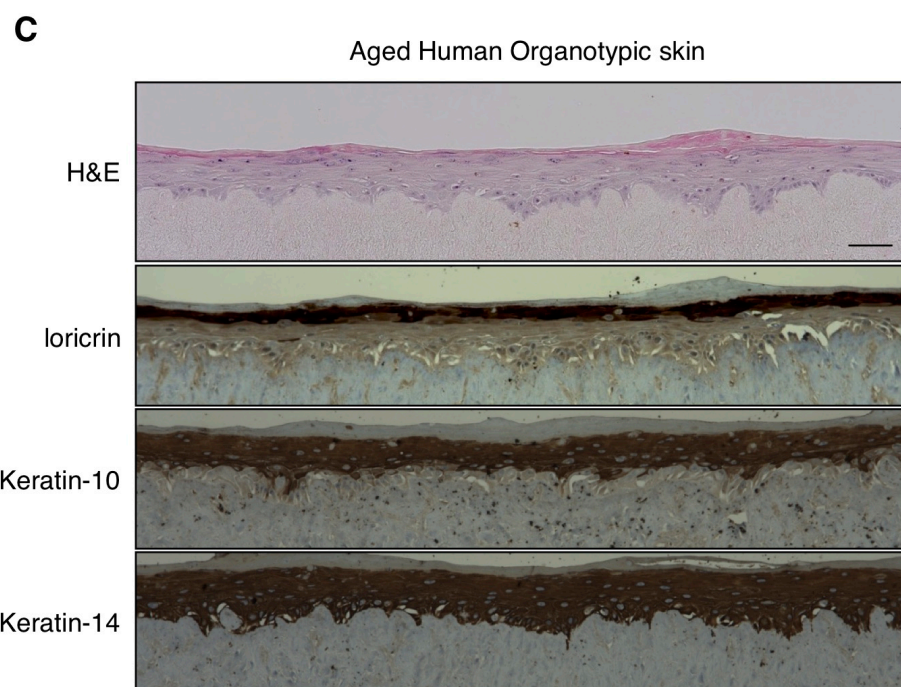

**D**

Primary Human Keratinocytes used for *in vitro* experiments

| Age (years) | Location | Passage |
|-------------|----------|---------|
| <1          | Foreskin | 4       |
| 64          | Face     | 6       |
| 72          | Forearm  | 8       |
| 80          | Scalp    | 5       |
| 99          | Scalp    | 5       |

**Figure S4, Related to Figure 4: Mouse and human skin exhibit age-dependent EZH2-mediated SDF1 induction.**

(A) Known transcriptional regulators of SDF1 are unchanged with age. Relative mRNA levels of *Cdkn1a* and *Cebpa* in wound edge tissue taken from young or aged WT mice at baseline and 1-week post-injury.  $N=6$  mice per time point.

(B) Absence of H3K27me3, H3K4me3, and EZH2 enrichment at a control region located 20kb away from the SDF1 gene.  $N=6$  mice per group.

(C) Aged human organoids exhibit appropriate skin differentiation program. H&E staining (upper panel) and loricrin, keratin-10, and keratin-14 immunostaining (lower panels, brown) of aged human skin organoid.  $N=5$ .

(D) Table describing source of primary human keratinocytes, including: age, location, and passage number.

$N$ =biological replicates per group. Error bars are s.e.m. Scale bars, 100 $\mu$ M.
